# Supplementary material for: Adsorbed Tween 80 is unique in its ability to improve the stability of gold nanoparticles in solutions of biomolecules
Source: Royal Society of Chemistry journal article supplement (doi:10.1039/c0nr00309c), 2010-01-01
Supplement: c0nr00309c.pdf [file c0nr00309c.pdf]

## Supporting Information

# Adsorbed Tween 80 is unique in its ability to improve the stability of gold nanoparticles in solutions of biomolecules

Yuyun Zhao, Zhuo Wang, Wei Zhang and Xingyu Jiang\*

<sup>5</sup> Received (in XXX, XXX) Xth XXXXXXXXXX 200X, Accepted Xth XXXXXXXXXX 200X

First published on the web Xth XXXXXXXXXX 200X

DOI: 10.1039/b000000x

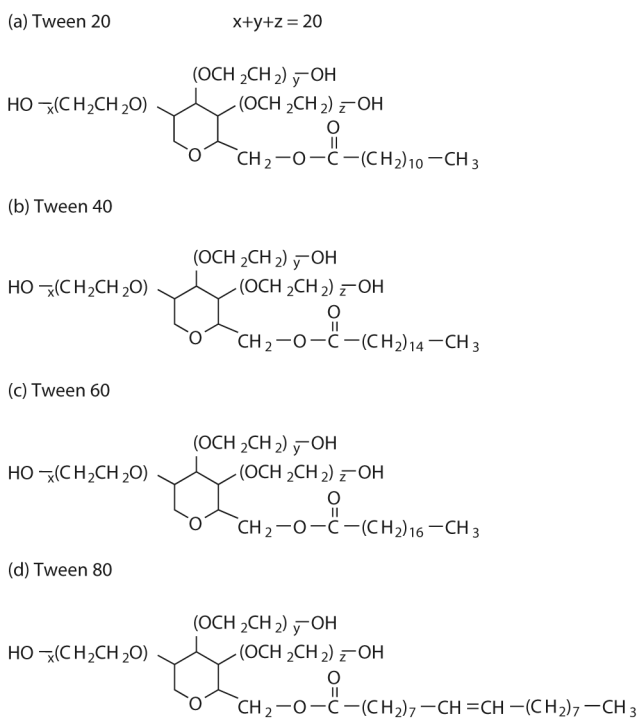

10 **Fig. S1** Chemical structures of the nonionic surfactants.

**Table S1** Physicochemical properties of surfactants.

| Surfactant | Composition         |                    | Physicochemical parameters |                       |
|------------|---------------------|--------------------|----------------------------|-----------------------|
|            | lipophilic moiety   | hydrophilic moiety | HLB <sup>a</sup> value     | CMC <sup>b</sup> (μM) |
|            | Ethylene oxide unit | other              |                            |                       |
| Tween 20   | monolaurate         | 20 sorbitan        | 16.7                       | 49                    |
| Tween 40   | monopalmitate       | 20 sorbitan        | 15.6                       | 23                    |
| Tween 60   | monostearate        | 20 sorbitan        | 14.9                       | 20                    |
| Tween 80   | monooleate          | 20 sorbitan        | 15.0                       | 13                    |

<sup>a</sup> HLB, hydrophilic lipophilic balance. <sup>b</sup> CMC, critical micellar concentration. Ref. G. Guillon, C. Roy and S. Jard, *Eur. J. Biochem.*, 1978, **92**, 341.

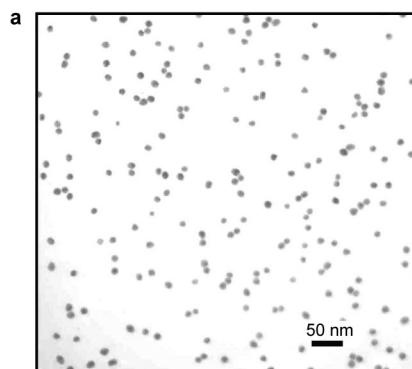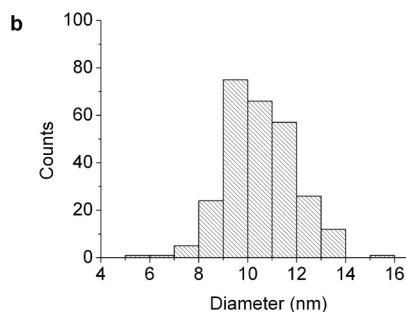

15

**Fig. S2** Transmission electron microscopy of gold NPs stabilized by citrate (a) and the size distribution of NPs in a sample of 280 particles (b). The diameter is  $10.2 \pm 1.7$  nm.

## Notes

<sup>20</sup> National Center for NanoScience and Technology, No. 11, Beiyitiao Zhongguancun, Beijing 100190, China. Fax: +86-10-82545631; Tel: +86-10-82545558; E-mail: xingyujiang@nanoctr.cn
